# Supplementary material for: Distinct Roles of Smooth Muscle and Non-muscle Myosin Light Chain-Mediated Smooth Muscle Contraction
Source: PubMed Central journal article supplement (PMC7793928; doi:10.3389/fphys.2020.593966), 2020-12-03
Supplement: Data_Sheet_1.pdf [file Data_Sheet_1.pdf]

## Supplementary Material

### Supplementary Figures

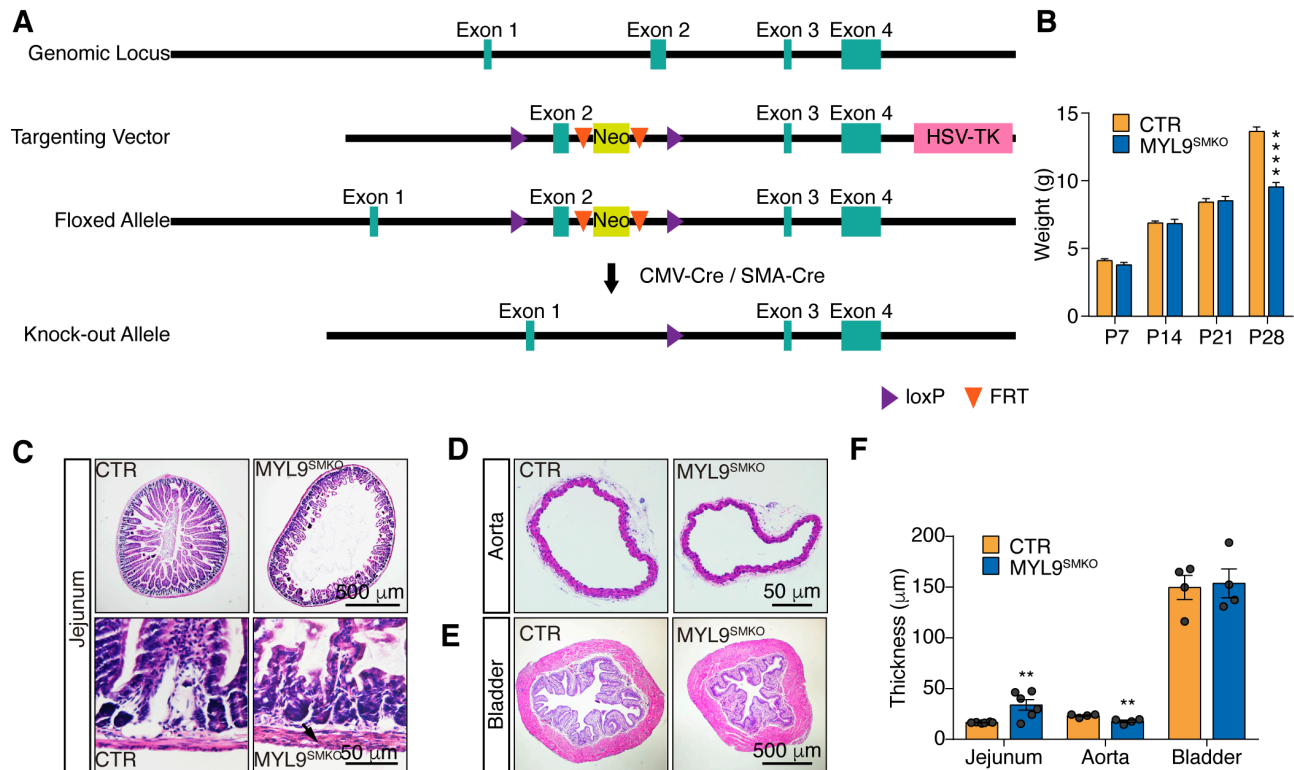

**Supplementary Figure 1.** Generation of *Myl9* knock out mice, and body weight and histological analysis of *Myl9* SM-specific-knockout mice. **(A)** Schematic representation of *Myl9* knock out strategy. Genomic DNA fragments containing *Myl9* gene were subcloned from BAC. A loxP site (purple triangle) and an FRT-Neo-FRT-loxP cassette were targeted to flank Exon 2. Mice containing the floxed allele were crossed with CMV-Cre or SMA-Cre to generate global knockout or smooth muscle specific knockout mice. **(B)** Body weights of CTR and MYL9<sup>SMKO</sup> mice at P7, P14, P21 and P28. The data are presented as mean ± SEM (CTR: n = 20; MYL9<sup>SMKO</sup>: n = 11). \*\*\*\* P < 0.0001 (unpaired Student's t-test, one-sided). **(C-E)** Histological sections of jejunum (C), aorta (D) and bladder (E) from CTR and MYL9<sup>SMKO</sup> mice were stained with H&E. The scale bars are indicated in the figures. The arrowhead represents the MYL9<sup>SMKO</sup> jejunum SM layer. **(F)** Statistical analysis of panel (C-E). The data are presented as mean ± SEM (Jejunum: n = 6; Aorta: n = 4; Bladder: n = 4). \*\* P < 0.01 (unpaired Student's t-test, one-sided).

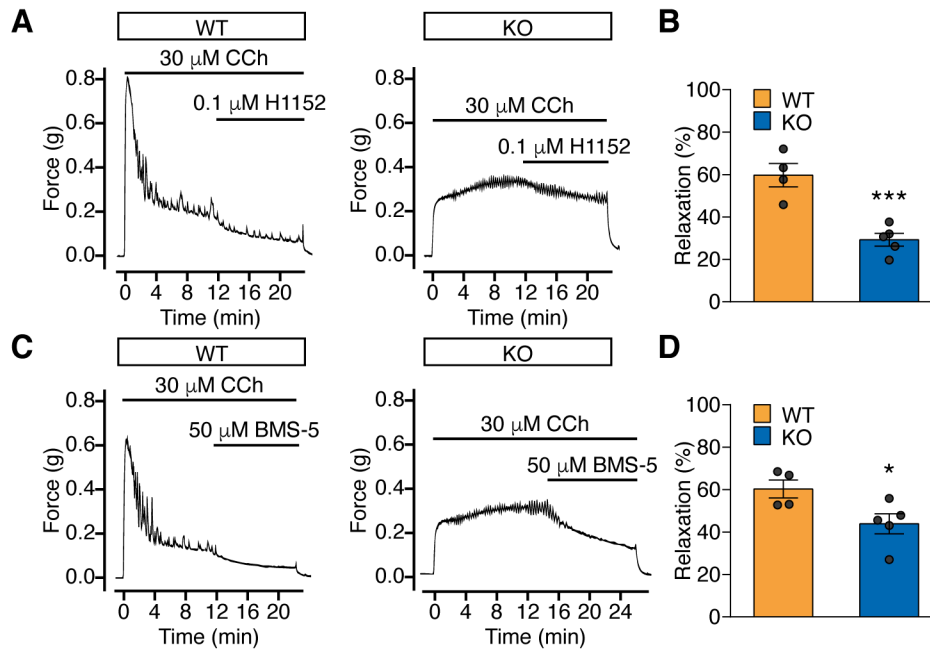

**Supplementary Figure 2.** H1152 and BMS-5 have less effects on relaxing mutant bladder SM than WT bladder SM strips. **(A)** Representative force tracing of CCh-induced bladder SM contraction when the ROCK inhibitor H1152 was applied. **(B)** Statistical analysis of the percentage of relaxation induced by H1152 in panel (a) (WT:  $n = 4$ ; KO:  $n = 5$ ). **(C)** Representative force tracing of CCh-induced bladder SM contraction when the LIMK inhibitor BMS-5 was applied. **(D)** Statistical analysis of the percentage of relaxation induced by BMS-5 in panel (C) (WT:  $n = 4$ ; KO:  $n = 5$ ). For panels (B) and (D), Y value = the force after inhibitor application for 10 min / the force when the inhibitor was applied. The data are presented as mean  $\pm$  SEM. \*  $P < 0.05$ ; \*\*\*  $P < 0.001$ ; (unpaired Student's t-test, one-sided).
